# Supplementary material for: Soil Biological Activity, Carbon and Nitrogen Dynamics in Modified Coffee Agroforestry Systems in Mexico
Source: MDPI journal article supplement (doi:10.3390/agronomy12081794), 2022-07-29
Supplement: s1 [file s1]

**Table S1.** Correlation between soil respiration (by depths) and evaluated variables (continues)

| System | Depth |         | SMB <sub>10</sub> | SMB <sub>20</sub> | SMB <sub>30</sub> | SMB   | SOM <sub>10</sub> | SOM <sub>20</sub> | SOM <sub>30</sub> | TBC   | CPC   | RBC   | PBC   |
|--------|-------|---------|-------------------|-------------------|-------------------|-------|-------------------|-------------------|-------------------|-------|-------|-------|-------|
| RCS    | 0-10  | Coef.-C | -0.50             | 1                 | -0.87             | -0.50 | 1                 | 1                 | -0.50             | -1    | 1     | 0.87  | 0.50  |
|        |       | P-value | 0.48              | *                 | 0.22              | 0.48  | *                 | *                 | 0.48              | *     | *     | 0.22  | 0.48  |
|        | 10-20 | Coef.-C | 0.50              | -1                | 0.87              | 0.50  | -1                | -1                | 0.50              | 1     | -1    | -0.87 | -0.50 |
|        |       | P-value | 0.48              | *                 | 0.22              | 0.48  | *                 | *                 | 0.48              | *     | *     | 0.22  | 0.48  |
|        | 20-30 | Coef.-C | 0.50              | -1                | 0.87              | 0.50  | -1                | -1                | 0.50              | 1     | -1    | -0.87 | -0.50 |
|        |       | P-value | 0.48              | *                 | 0.22              | 0.48  | *                 | *                 | 0.48              | *     | *     | 0.22  | 0.48  |
| IPCS   | 0-10  | Coef.-C | -1                | -0.50             | -0.87             | -1    | 1                 | 1                 | 1                 | -1    | 0.50  | 0.50  | 0.50  |
|        |       | P-value | *                 | 0.48              | 0.22              | *     | *                 | *                 | *                 | *     | 0.48  | 0.48  | 0.48  |
|        | 10-20 | Coef.-C | 0.50              | 1                 | 0                 | 0.50  | -0.50             | -0.50             | -0.50             | 0.50  | 0.50  | 0.50  | 0.50  |
|        |       | P-value | 0.48              | *                 | 1                 | 0.48  | 0.48              | 0.48              | 0.48              | 0.48  | 0.48  | 0.48  | 0.48  |
|        | 20-30 | Coef.-C | 0.50              | -0.50             | 0.87              | 0.50  | -0.50             | -0.50             | -0.50             | 0.50  | -1    | -1    | -1    |
|        |       | P-value | 0.48              | 0.48              | 0.22              | 0.48  | 0.48              | 0.48              | 0.48              | 0.48  | *     | *     | *     |
| CAS    | 0-10  | Coef.-C | -0.87             | -                 | -                 | -0.87 | 0.50              | -1                | -0.50             | -0.50 | 0.50  | 0.50  | 1     |
|        |       | P-value | 0.22              | -                 | -                 | 0.22  | 0.48              | *                 | 0.48              | 0.48  | 0.48  | 0.48  | *     |
|        | 10-20 | Coef.-C | -0.87             | -                 | -                 | -0.87 | -0.50             | -0.50             | -1                | -1    | -0.50 | 1     | 0.50  |
|        |       | P-value | 0.22              | -                 | -                 | 0.22  | 0.48              | 0.48              | *                 | *     | 0.48  | *     | 0.48  |
|        | 20-30 | Coef.-C | -0.87             | -                 | -                 | -0.87 | 0.50              | -1                | -0.50             | -0.50 | 0.50  | 0.50  | 1     |
|        |       | P-value | 0.22              | -                 | -                 | 0.22  | 0.48              | *                 | 0.48              | 0.48  | 0.48  | 0.48  | *     |
| CAO    | 0-10  | Coef.-C | 0                 | -                 | -                 | 0     | -1                | -1                | -0.50             | 0.50  | -     | 0.50  | 0.50  |
|        |       | P-value | 1                 | -                 | -                 | 1     | *                 | *                 | 0.48              | 0.48  | -     | 0.48  | 0.48  |
|        | 10-20 | Coef.-C | 0                 | -                 | -                 | 0     | 1                 | 1                 | 0.50              | -0.50 | -     | -0.50 | -0.50 |
|        |       | P-value | 1                 | -                 | -                 | 1     | *                 | *                 | 0.48              | 0.48  | -     | 0.48  | 0.48  |
|        | 20-30 | Coef.-C | -0.87             | -                 | -                 | -0.87 | -0.50             | -0.50             | -1                | -0.50 | -     | -0.50 | -0.50 |
|        |       | P-value | 0.22              | -                 | -                 | 0.22  | 0.48              | 0.48              | *                 | 0.48  | -     | 0.48  | 0.48  |

SMB: Soil macrofauna (biomass of organisms accumulated at 0-30 cm depth); SOM: Soil organic matter; TBC: C in trees; CPC: C in coffee plants; RBC: C in roots; PBC: C in plant biomass; Depth in cm; *Coef.-C*: *Spearman's* correlation coefficient; \*Significance  $p \leq 0.05$ . RCS: renovated coffee agroforestry system, IPCS: coffee agroforestry system with intensive pruning, CAS: Coffee agroforestry system with the introduction of avocado, CAO: Avocado orchard system.

**Table S2.** Correlation between soil respiration (by depths) and variables (continues).

| System | Depth |                 | C-LL  | C-LF  | C <sub>10</sub> | C <sub>20</sub> | C <sub>30</sub> | SOC   | N-LL  | N-LF  |
|--------|-------|-----------------|-------|-------|-----------------|-----------------|-----------------|-------|-------|-------|
| RCS    | 0-10  | Coef.-C         | 1     | 1     | 0.50            | 0.50            | -0.50           | 0.50  | 1     | 1     |
|        |       | <i>P</i> -value | *     | *     | 0.48            | 0.48            | 0.48            | 0.48  | *     | *     |
|        | 10-20 | Coef.-C         | -1    | -1    | -0.50           | -0.50           | 0.50            | -0.50 | -1    | -1    |
|        |       | <i>P</i> -value | *     | *     | 0.48            | 0.48            | 0.48            | 0.48  | *     | *     |
|        | 20-30 | Coef.-C         | -1    | -1    | -0.50           | -0.50           | 0.50            | -0.50 | -1    | -1    |
|        |       | <i>P</i> -value | *     | *     | 0.48            | 0.48            | 0.48            | 0.48  | *     | *     |
| IPCS   | 0-10  | Coef.-C         | -1    | 1     | 0.50            | 1               | 0.50            | 0.50  | -0.50 | 1     |
|        |       | <i>P</i> -value | *     | *     | 0.48            | *               | 0.48            | 0.48  | 0.48  | *     |
|        | 10-20 | Coef.-C         | 0.50  | -0.50 | -1              | -0.50           | -1              | -1    | -0.50 | -0.50 |
|        |       | <i>P</i> -value | 0.48  | 0.48  | *               | 0.48            | *               | *     | 0.48  | 0.48  |
|        | 20-30 | Coef.-C         | 0.50  | -0.50 | 0.50            | -0.50           | 0.50            | 0.50  | 1     | -0.50 |
|        |       | <i>P</i> -value | 0.48  | 0.48  | 0.48            | 0.48            | 0.48            | 0.48  | *     | 0.48  |
| CAS    | 0-10  | Coef.-C         | -1    | -     | 1               | 0.50            | -0.50           | 0.50  | -1    | -     |
|        |       | <i>P</i> -value | *     | -     | *               | 0.48            | 0.48            | 0.48  | *     | -     |
|        | 10-20 | Coef.-C         | -0.50 | -     | 0.50            | 1               | 0.50            | 1     | -0.50 | -     |
|        |       | <i>P</i> -value | 0.48  | -     | 0.48            | *               | 0.48            | *     | 0.48  | -     |
|        | 20-30 | Coef.-C         | -1    | -     | 1               | 0.50            | -0.50           | 0.50  | -1    | -     |
|        |       | <i>P</i> -value | *     | -     | *               | 0.48            | 0.48            | 0.48  | *     | -     |
| CAO    | 0-10  | Coef.-C         | 0.50  | -     | -0.50           | -1              | -1              | -1    | 1     | -     |
|        |       | <i>P</i> -value | 0.48  | -     | 0.48            | *               | *               | *     | *     | -     |
|        | 10-20 | Coef.-C         | -0.50 | -     | 0.50            | 1               | 1               | 1     | -1    | -     |
|        |       | <i>P</i> -value | 0.48  | -     | 0.48            | *               | *               | *     | *     | -     |
|        | 20-30 | Coef.-C         | -0.50 | -     | -1              | -0.50           | -0.50           | -0.50 | 0.50  | -     |
|        |       | <i>P</i> -value | 0.48  | -     | *               | 0.48            | 0.48            | 0.48  | 0.48  | -     |

C-LL: C in layer *L* or litter; C-LF: C in layer *F* or mulch; C<sub>10</sub>: carbon 0-10 cm of depth; C<sub>20</sub>: carbon 10 -20 cm of depth; C<sub>30</sub>: carbon 20-30 cm of depth; SOC: soil organic C (accumulated at the depth of 0-30 cm); N-LL: N in layer *L* or litter; N-LF: N in layer *F* or mulch; Depth in cm; *Coef.-C*: *Spearman's* correlation coefficient; \*Significance  $p \leq 0.05$ . RCS: renovated coffee agroforestry system, IPCS: coffee agroforestry system with intensive pruning, CAS: Coffee agroforestry system with the introduction of avocado, CAO: Avocado orchard system.

**Table S3.** Correlation between soil respiration (by depths) and evaluated variables (conclude)

| System | Depth |         | N <sub>10</sub> | N <sub>20</sub> | N <sub>30</sub> | STN       | C-LL<br>/N-LL | C-LF<br>/N-LF | C <sub>10</sub> /N <sub>10</sub> | C <sub>20</sub> /N <sub>20</sub> | C <sub>30</sub> /<br>N <sub>30</sub> | C/N   |
|--------|-------|---------|-----------------|-----------------|-----------------|-----------|---------------|---------------|----------------------------------|----------------------------------|--------------------------------------|-------|
| RCS    | 0-10  | Coef.-C | 0.50            | -<br>0.50       | 0.50            | 0.50      | 0.50          | 1             | -0.50                            | 0.50                             | -0.50                                | -0.50 |
|        |       | P-value | 0.48            | 0.48            | 0.48            | 0.48      | 0.48          | *             | 0.48                             | 0.48                             | 0.48                                 | 0.48  |
|        | 10-20 | Coef.-C | -<br>0.50       | 0.50            | -<br>0.50       | -<br>0.50 | -0.50         | -1            | 0.50                             | -0.50                            | 0.50                                 | 0.50  |
|        |       | P-value | 0.48            | 0.48            | 0.48            | 0.48      | 0.48          | *             | 0.48                             | 0.48                             | 0.48                                 | 0.48  |
|        | 20-30 | Coef.-C | -<br>0.50       | 0.50            | -<br>0.50       | -<br>0.50 | -0.50         | -1            | 0.50                             | -0.50                            | 0.50                                 | 0.50  |
|        |       | P-value | 0.48            | 0.48            | 0.48            | 0.48      | 0.48          | *             | 0.48                             | 0.48                             | 0.48                                 | 0.48  |
| IPCS   | 0-10  | Coef.-C | -<br>0.50       | -<br>0.50       | -<br>0.50       | -<br>0.50 | -0.50         | 1             | 1                                | 0.50                             | 1                                    | 1     |
|        |       | P-value | 0.48            | 0.48            | 0.48            | 0.48      | 0.48          | *             | *                                | 0.48                             | *                                    | *     |
|        | 10-20 | Coef.-C | -<br>0.50       | -<br>0.50       | -<br>0.50       | -<br>0.50 | 1             | -0.50         | -0.50                            | 0.50                             | -0.50                                | -0.50 |
|        |       | P-value | 0.48            | 0.48            | 0.48            | 0.48      | *             | 0.48          | 0.48                             | 0.48                             | 0.48                                 | 0.48  |
|        | 20-30 | Coef.-C | 1               | 1               | 1               | 1         | -0.50         | -0.50         | -0.50                            | -1                               | -0.50                                | -0.50 |
|        |       | P-value | *               | *               | *               | *         | 0.48          | 0.48          | 0.48                             | *                                | 0.48                                 | 0.48  |
| CAS    | 0-10  | Coef.-C | 0.50            | 0.50            | 0.50            | 0.50      | 1             | -             | 0.50                             | -0.50                            | -1                                   | -1    |
|        |       | P-value | 0.48            | 0.48            | 0.48            | 0.48      | *             | -             | 0.48                             | 0.48                             | *                                    | *     |
|        | 10-20 | Coef.-C | -<br>0.50       | 1               | 1               | 1         | 0.50          | -             | 1                                | -1                               | -0.50                                | -0.50 |
|        |       | P-value | 0.48            | *               | *               | *         | 0.48          | -             | *                                | *                                | 0.48                                 | 0.48  |
|        | 20-30 | Coef.-C | 0.50            | 0.50            | 0.50            | 0.50      | 1             | -             | 0.50                             | -0.50                            | -1                                   | -1    |
|        |       | P-value | 0.48            | 0.48            | 0.48            | 0.48      | *             | -             | 0.48                             | 0.48                             | *                                    | *     |
| CAO    | 0-10  | Coef.-C | 1               | 0.50            | -<br>0.50       | 0.50      | 0.50          | -             | -0.50                            | -0.50                            | -0.50                                | -0.50 |
|        |       | P-value | *               | 0.48            | 0.48            | 0.48      | 0.48          | -             | 0.48                             | 0.48                             | 0.48                                 | 0.48  |
|        | 10-20 | Coef.-C | -1              | -<br>0.50       | 0.50            | -<br>0.50 | -0.50         | -             | 0.50                             | 0.50                             | 0.50                                 | 0.50  |
|        |       | P-value | *               | 0.48            | 0.48            | 0.48      | 0.48          | -             | 0.48                             | 0.48                             | 0.48                                 | 0.48  |
|        | 20-30 | Coef.-C | 0.50            | 1               | 0.50            | 1         | -0.50         | -             | -1                               | -1                               | -1                                   | -1    |
|        |       | P-value | 0.48            | *               | 0.48            | *         | 0.48          | -             | *                                | *                                | *                                    | *     |

N<sub>10</sub>:nitrogen 0-10 cm of depth; N<sub>20</sub>: nitrogen 10 -20 cm of depth; N<sub>30</sub>: nitrogen 20-30 cm of depth; STN: soil total N; N-LL: N in layer *L* or litter; N-LF: N in layer *F* or mulch; C/N: Soil carbon/nitrogen ratio; Depth in cm; *Coef-C*: *Spearman's* correlation coefficient; \*Significance  $p \leq 0.05$ . RCS: renovated coffee agroforestry system, IPCS: coffee agroforestry system with intensive pruning, CAS: Coffee agroforestry system with the introduction of avocado, CAO: Avocado orchard system.
